# Supplementary material for: Calcination-induced enhancement of Cd2+ and Pb2+ electrochemical detection capabilities of nano-ag-supported CoZn bi-metal ZIFs
Source: Royal Society of Chemistry journal article supplement (doi:10.1039/d3en00956d), 2024-01-01
Supplement: d3en00956d1.pdf [file d3en00956d1.pdf]

# **Calcination-Induced Enhancement of Cd<sup>2+</sup> and Pb<sup>2+</sup> Electrochemical Detection Capabilities of Nano-Ag Supported CoZn bi-metal ZIFs**

Siyan Wang, Yangcan Zhao, Chengkai Xia, Wantong Zhu, Ying Hou, Xiangpeng Zeng,

Hongyan Xu\*

School of Materials Science and Engineering, North University of China, Taiyuan,

Shanxi 030051, China

\*Corresponding author, E-mail address: xuhongyan@nuc.edu.cn

Siyan Wang and Yangcan Zhao have equal contribution on this manuscript.

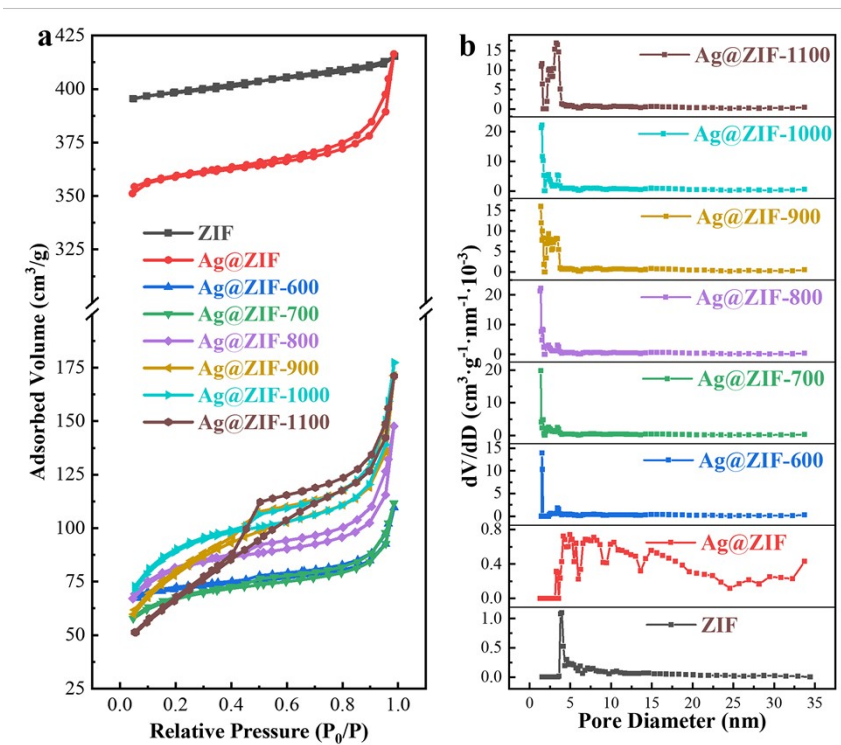

**Fig. S1**  $N_2$  adsorption/desorption isotherms (a) and pore size distribution curves (b) of ZIF, Ag@ZIF, and Ag@ZIF-T (T = 600, 700, 800, 900, 1000, and 1100).

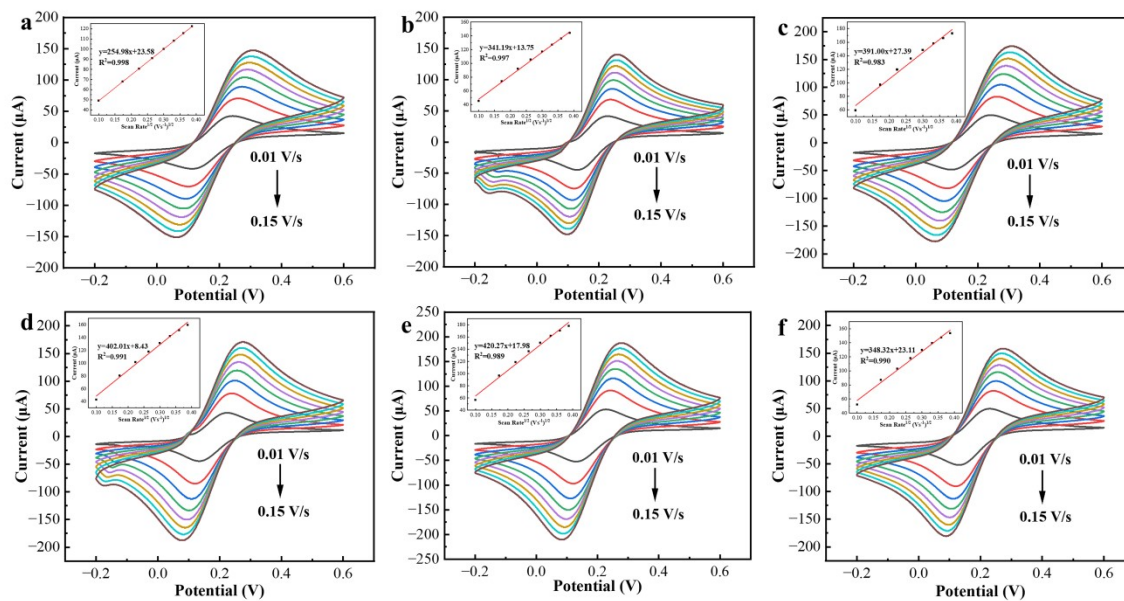

**Fig. S2** CV curves related to the scan rate of different electrodes in 0.1 M KCl solution containing 5mM  $\text{Fe}(\text{CN})_6^{3-/4-}$ : Ag@ZIF-600 (a), Ag@ZIF-700 (b), Ag@ZIF-800 (c), Ag@ZIF-900 (d), Ag@ZIF-1000 (e), Ag@ZIF-1100 (f).

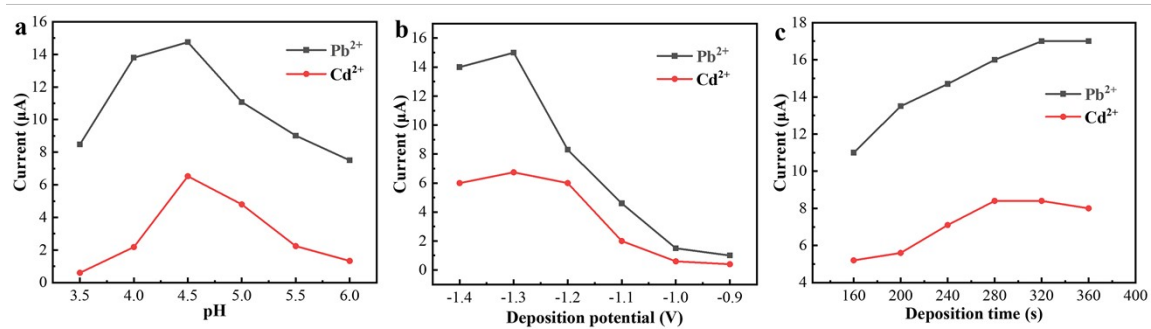

**Fig. S3** Effects of experimental parameters of buffer solution pH (a), deposition potential (b), and deposition time (c) on the response current for 2  $\mu M$   $Cd^{2+}$  and  $Pb^{2+}$  in 0.1 M HAC-NaAc solution.
